# Supplementary material
Source: HighWire-hosted journal article supplement (https://www.cmajopen.ca/highwire/filestream/80877/field_highwire_adjunct_files/5/open-2015-0025-reviewer-comments.pdf)
Supplement: open-2015-0025-reviewer-comments.pdf [file open-2015-0025-reviewer-comments.pdf]

| Article details: 2015-0025 |                                                                                                                                                                                                                                                                                                                                                                                                                                                                                                                                                                                                                                                                                                                                                                                                                                                                                                                                                                                                                                                                                                                   |
|----------------------------|-------------------------------------------------------------------------------------------------------------------------------------------------------------------------------------------------------------------------------------------------------------------------------------------------------------------------------------------------------------------------------------------------------------------------------------------------------------------------------------------------------------------------------------------------------------------------------------------------------------------------------------------------------------------------------------------------------------------------------------------------------------------------------------------------------------------------------------------------------------------------------------------------------------------------------------------------------------------------------------------------------------------------------------------------------------------------------------------------------------------|
| Title                      | Ebola preparedness: a rapid needs assessment of critical care in a tertiary hospital                                                                                                                                                                                                                                                                                                                                                                                                                                                                                                                                                                                                                                                                                                                                                                                                                                                                                                                                                                                                                              |
| Authors                    | Aimee J. Sarti MD, Stephanie Sutherland PhD, Nicholas Robillard MD, John Kim, Kirsten Dupuis, Mary Thornton, Marlene Mansour MD, Pierre Cardinal MD MScEpi                                                                                                                                                                                                                                                                                                                                                                                                                                                                                                                                                                                                                                                                                                                                                                                                                                                                                                                                                        |
| Reviewer 1                 | —                                                                                                                                                                                                                                                                                                                                                                                                                                                                                                                                                                                                                                                                                                                                                                                                                                                                                                                                                                                                                                                                                                                 |
| Institution                | —                                                                                                                                                                                                                                                                                                                                                                                                                                                                                                                                                                                                                                                                                                                                                                                                                                                                                                                                                                                                                                                                                                                 |
| General comments           | —                                                                                                                                                                                                                                                                                                                                                                                                                                                                                                                                                                                                                                                                                                                                                                                                                                                                                                                                                                                                                                                                                                                 |
| Reviewer 2                 | Wajid Ahmed                                                                                                                                                                                                                                                                                                                                                                                                                                                                                                                                                                                                                                                                                                                                                                                                                                                                                                                                                                                                                                                                                                       |
| Institution                | Department of Epidemiology and Community Medicine, University of Ottawa                                                                                                                                                                                                                                                                                                                                                                                                                                                                                                                                                                                                                                                                                                                                                                                                                                                                                                                                                                                                                                           |
| General comments           | <p>Timely topic given the concerns of Ebola in the general community.</p> <p>Emergent design is used to incorporate changing guidelines and practices in caring for a suspect or confirmed Ebola case.</p> <p>Given the limited space to report findings, the three chosen themes accurately reflects the significance of the themes. Even though training is integrated into many of these themes, highlighting the importance of infection prevention and control education including Ebola specific training could be useful.</p> <p><b>Author response:</b> You are correct, this is a very important component. As such we have added to the manuscript to ensure that this point is clearly expressed. In the results, we have presented data describing this education, for example the rapid development of curriculum on PPE donning and doffing was developed and how this led to increased satisfaction among participants. In the discussion we have added a sentence to paragraph #5 to emphasize the importance of infection prevention and control education as part of preparedness planning.</p> |
